# Supplementary material for: The role of parental and peer support linking youth adversity and adolescent mental health: a moderated mediation study at the intersection of gender, socioeconomic background, and ethnicity
Source: Research Square preprint supplement (doi:10.21203/rs.3.rs-6801693/v1), 2025-07-02
Supplement: Supplementary file 1 [file d19e29b36aaf4790a7a0d5ed.docx]

**Supplementary Materials 1.** Parental support items

| **Items from the Brief Current form of the Parental Bonding Instrument (Klimidis et al., 1992)**  [My mother/father…] | **Corresponding items in DASH study**  [How would you describe your parents (OR stepparents OR foster parents)] | **Corresponding parental support variable in current study** |
| --- | --- | --- |
| 1. Makes me feel better when I am upset | Make me feel better when I am upset | Nurturing |
| 1. Seems to understand my problems | Understand my problems and worries | Nurturing |
| 1. Does not help me as much as I need | Help me as much as I need | Nurturing |
| 1. Seems emotionally cold to me | Are loving | Nurturing |
| 1. Gives me as much freedom as I want | Let me do the things I like doing | Autonomy-giving |
| 1. Let’s me make my own decisions | Like me to make my own decisions | Autonomy-giving |
| 1. Treats me like a baby and tries to protect me from everything | Treat me like a baby (reverse coded) | Control |
| 1. Tries to control everything I do | Try to control everything I do (reverse coded) | Control |

Response categories: “Never”, “Sometimes”, “Almost always”, “Always”. For the items ‘Understand my problems and worries‘, ‘Are loving’ and ‘Let me do the things I like doing’ – the response categories “Never” and “Sometimes” were collapsed into a single category because of missing cell values (not accommodated with weighted least squares estimation) for some groups.

In Klimidis et al., exploratory factor analysis suggested a two-factor structure of items 1-4, and items 5-8

*Klimidis, S., Minas, I. H., & Ata, A. W. (1992). The PBI-BC: A brief current form of the parental bonding instrument for adolescent research. Comprehensive Psychiatry, 33(6), 374–377*

**Supplementary Materials 2.** Parallel analysis and exploratory factor analysis for parental support items

*Methods*: Parallel analysis with 500 simulated analyses was used to determine the number of factors to specify in subsequent exploratory factor analysis of the parental support items (using 50% of the full sample, randomly selected; *N* = 3,315). Briefly, parallel analysis calculates eigenvalues of a randomly generated data matrix (reflecting the same number of variables and observations as the sample data) and estimates the number of components/factors in the sample data with eigenvalues exceeding the randomly generated eigenvalues. Data was entered as a Polychoric correlation matrix in the current analysis.

Using the number of components and factors suggested by the parallel analysis, exploratory factor analysis was run (for the randomly selected 50% of the sample; *N* = 3,046 with available data) using diagonally weighted least squares estimation, with data specified as categorical. Quartimin rotation was used, and the model was subsequently rerun with additional random starts and using Geomin rotation, as sensitivity analyses.

Confirmatory factor analysis was subsequently conducted to compare the fit of the model suggested by the exploratory factor analysis, a model suggested by previous findings (Klimidis et al., 1992; detailed in *Supplementary Materials 1*), and a one-factor model (as a hypothetical baseline).

*Results*: Parallel analysis of the parental support items suggested three components and two factors. Rotated factor loadings suggested that the two items reflecting control (items 7 and 8) loaded onto a separate factor in both a two-factor and three-factor specification, and that the parental nurturing items (items 1-4) and the parental autonomy-giving items (items 5 and 6) loaded onto separate factors in a three-factor solution. Results were substantively similar for the sensitivity analyses.

In subsequent confirmatory factor analysis (run for the other 50% of the sample), specifications of models that included a separate factor indicated by the control items resulted in errors pertaining to the observed ‘doesn’t treat me like a baby’ variable. Subsequently, a two-factor model with the control items removed provided a better representation of the data (CFI = 0.996, TLI = 0.993, RMSEA = 0.039 [0.028, 0.051], SRMR = 0.015) than a one-factor model both with (CFI = 0.896, TLI = 0.854, RMSEA = 0.131 [0.12, 0.138], SRMR = 0.066) and without (CFI = 0.956, TLI = 0.927, RMSEA = 0.125 [0.116, 0.136], SRMR = 0.045) the control items.

In the current study, model specifications recommended for confirmatory factor analysis using ordered categorical data were used (Svetina et al., 2020; Wu & Estabrook, 2016).

*Svetina, D., Rutkowski, L., & Rutkowski, D. (2020). Multiple-group invariance with categorical outcomes using updated guidelines: An illustration using M plus and the lavaan/semtools packages. Structural Equation Modeling: A Multidisciplinary Journal, 27(1), 111–130.*

*Wu, H., & Estabrook, R. (2016). Identification of confirmatory factor analysis models of different levels of invariance for ordered categorical outcomes. Psychometrika, 81(4), 1014–1045.*

**Supplementary Materials 3.** Classification offriendship integration

Individuals were classified as *having* *culturally integrated friendships* where they reported 1) having [most, quite a lot, or some] good friends who belong to their own race or ethnic group, *and* having good friends who belong to other race or ethnic groups, *or* 2) not having [most, quite a lot, or some] good friends who belong to their own race or ethnic group, *and* having good friends who belong to other race or ethnic groups.

Individuals were classified as *not having culturally integrated friendships* where they reported 1) not having [most, quite a lot, or some] good friends who belong to their own race or ethnic group, *and* not having good friends who belong to other race or ethnic groups, *or* 2) having [most, quite a lot, or some] good friends who belong to their own race or ethnic group, *and* not having good friends who belong to other race or ethnic groups.

*Berry, J. W. (2017). Theories and models of acculturation. The Oxford Handbook of Acculturation and Health, 15–28*

**Supplementary Materials 4.** Itemsassessing household affluence in DASH

[Does your family have any of the following things? (If yes, please write how many)]

1. Car or van
2. CD player pr HI FI system
3. Video or DVD player
4. Garage
5. Bedrooms
6. Television
7. Telephone
8. Home computer
9. Toilet
10. Holiday abroad each year
11. Deep freeze or fridge freezer
12. Dishwasher
13. Garden (not shared with other families)
14. Washing machine
15. Microwave oven
16. Satellite, cable, digital TV
17. Tumble dryer

**Supplementary Materials 5.** M*plus* code for final multiple-group model

TITLE: Mediation multiple-group

VARIABLE:

USEVARIABLES =

underst

helps

lets

loving

decisions

better

p_rels

f_integr

f_confide

head

worry

nervous

fears

unhappy

ACES;

CATEGORICAL =

underst

helps

lets

loving

decisions

better

p_rels

f_integr

f_confide

head

worry

nervous

fears

unhappy;

GROUPING =

ISP (1 = 1

2 = 2 3 = 3

4 = 4 5 = 5

6 = 6 7 = 7

8 = 8 9 = 9

10 = 10 11 = 11

12 = 12 13 = 13

14 = 14 15 = 15

16 = 16);

ANALYSIS:

ESTIMATOR = WLSMV;

BOOTSTRAP = 1000;

MODEL:

!!! MEASUREMENT MODEL

!! Parental support factor

FAMSUP BY

underst (L1)

helps (L2)

loving (L3)

better (L4);

!! Autonomy-giving factor

AUTONOMY BY

lets (L5)

decisions (L6);

!! Depression/anxiety factor

EMO BY

head (L7)

worry (L8)

nervous (L9)

fears (L10)

unhappy (L11);

!!! STRUCTURAL MODEL

!! Youth adversity

FAMSUP ON ACES;

AUTONOMY ON ACES;

EMO ON ACES;

p_rels ON ACES;

f_integr ON ACES;

f_confide ON ACES;

!! Mediators

EMO ON FAMSUP;

EMO ON AUTONOMY;

EMO ON p_rels;

EMO ON f_integr;

EMO ON f_confide;

!! Disturbance covariances

FAMSUP WITH AUTONOMY p_rels f_integr f_confide;

AUTONOMY WITH p_rels f_integr f_confide;

p_rels WITH f_integr f_confide;

f_integr WITH f_confide;

MODEL 1:

!!! STRUCTURAL MODEL

!! Youth adversity

FAMSUP ON ACES (gr1_1);

AUTONOMY ON ACES (gr1_2);

EMO ON ACES (gr1_3**);**

p_rels ON ACES (gr1_4);

f_integr ON ACES (gr1_5);

f_confide ON ACES (gr1_6);

!! Mediators

EMO ON FAMSUP (gr1_7);

EMO ON AUTONOMY (gr1_8);

EMO ON p_rels (gr1_9);

EMO ON f_integr (gr1_10);

EMO ON f_confide (gr1_11);

!! Repeat MODEL 1 syntax for MODELS 2-16 (i.e., for the other groups) to add group-specific labels

**Supplementary Materials 6.** Additional notes on measurement invariance

One method that can be used to assess measurement invariance is confirmatory factor analysis. The term ‘invariance’ can figuratively be understood as ‘equivalence’. Using confirmatory factor analysis, a series of sequential models are typically specified whereby different parameters of a measurement model are constrained across groups. First, a configural model is specified to test for invariance in the broad configuration of items to factors. Second, a metric model tests for invariance in the factor loadings. Third, a scalar model tests for invariance in the item thresholds (for ordered categorical data, item intercepts for continuous data), in addition to the factor loadings. A unique variance model can be used to test for invariance in the item-level residual variances, though this is not typically assessed. The extent to which the fit of the sequentially tested model does not deteriorate substantially from that of the previous model is suggestive of invariance for the parameters being tested. Widely adopted rules of thumb exist for changes in fit indices (i.e., from a configural to a metric model, from a metric to a scalar model) where latent factor indicators are continuous, though there is less consensus on these values for binary indicators (see work by Svetina and Rutkowski, e.g., 2014; 2017).

*Svetina, D., & Rutkowski, L. (2017). Multidimensional measurement invariance in an international context: Fit measure performance with many groups. Journal of Cross-Cultural Psychology, 48(7), 991-1008.*

*Rutkowski, L., & Svetina, D. (2016). Measurement Invariance in International Surveys: Categorical Indicators and Fit Measure Performance. Applied Measurement in Education, 30(1), 39–51.*

**Supplementary Table 1.** Breakdown of Race/Ethnic Groups in Final Analytic Sample

| Race/ethnic group | *n* |
| --- | --- |
| White British | 1,136 |
| Black Caribbean | 779 |
| Black African | 923 |
| South Asian | 960 |
| Mixed | 497 |
| White Other | 621 |
| All Other | 746 |

*Note. n* = 5,662, reflecting individuals with intersectionality profile data and youth adversity data

**Supplementary Table 2.** Fit Indices (and Reliability Estimates) for Common Factor Model of Depression/Anxiety for Each Intersectional Profile

|  | **Intersectional profile** | | | | | | | |
| --- | --- | --- | --- | --- | --- | --- | --- | --- |
| *n*  No. parameters  *df*  Model test statistic(*p*)  RMSEA [90% CI]  CFI  TLI  SRMR  ------------  Omega [95% CI] | **Male, Higher SES, White British** | **Male, Higher SES, Black** | **Male, Higher SES, South Asian** | **Male, Higher SES, Other** | **Female, Higher SES, White British** | **Female, Higher SES, Black** | **Female, Higher SES, South Asian** | **Female, Higher SES, Other** |
| 377  15  5  2.559 (.768)  0.000 [0.000, 0.049]  1.000  1.000  0.020  0.689 [0.611, 0.747] | 411  15  5  3.505 (.663)  0.000 [0.000, 0.057]  1.000  1.000  0.023  0.731 [0.670, 0.777] | 337  15  5  11.335 (.045)  0.061 [0.008, 0.109]  0.973  0.947  0.034  0.720 [0.638, 0.776] | 517  15  5  25.063 (<.001)  0.088 [0.056, 0.124]  0.932  0.863  0.050  0.702 [0.645, 0.746] | 322  15  5  14.361 (.014)  0.076 [0.032, 0.124]  0.975  0.951  0.037  0.762 [0.701, 0.807] | 394  15  5  10.138 (.071)  0.051 [0.000, 0.096]  0.979  0.958  0.031  0.695 [0.625, 0.745] | 204  15  5  11.946 (.036)  0.083 [0.020, 0.144]  0.967  0.933  0.045  0.765 [0.693, 0.814] | 426  15  5  1.135 (.933)  0.000 [0.000, 0.018]  1.000  1.000  0.010  0.714 [0.654, 0.756] |
| *n*  No. parameters  *df*  Model test statistic(*p*)  RMSEA [90% CI]  CFI  TLI  SRMR  ------------  Omega [95% CI] | **Male, Lower SES, White British** | **Male, Lower SES, Black** | **Male, Lower SES, South Asian** | **Male, Lower SES, Other** | **Female, Lower SES, White British** | **Female, Lower SES, Black** | **Female, Lower SES, South Asian** | **Female, Lower SES, Other** |
| 218  15  5  16.947 (.005)  0.105 [0.053, 0.162]  0.941  0.882  0.059  0.747 [0.654, 0.805] | 389  15  5  5.036 (.042)  0.004 [0.004, 0.071]  1.000  1.000  0.029  0.725 [0.652, 0.774] | 237  15  5  8.127 (.149)  0.051 [0.000, 0.113]  0.980  0.959  0.037  0.723 [0.622, 0.790] | 465  15  5  4.529 (.476)  0.000 [0.000, 0.061]  1.000  1.000  0.020  0.750 [0.688, 0.790] | 220  15  5  5.122 (.401)  0.011 [0.000, 0.095]  0.999  0.999  0.032  0.741 [0.665, 0.792] | 508  15  5  14.337 (.014)  0.061 [0.025, 0.099]  0.974  0.948  0.034  0.710 [0.646, 0.749] | 184  15  5  7.903 (.162)  0.056 [0.000, 0.127]  0.977  0.953  0.041  0.706 [0.603, 0.777] | 460  15  5  10.377 (.065)  0.048 [0.000, 0.090]  0.985  0.970  0.030  0.712 [0.657, 0.755] |

*Note.* SES: socio-economic status.Model test statistic: chi-square test of the difference between the saturated and test model. RMSEA: root mean square error of estimation. CFI: comparative fit index. TLI: Tucker Lewis index. SRMR: standardised root mean square residual. Bootstrapped confidence intervals from 1,000 draws.

**Supplementary Table 3.** Fit Indices (and Reliability Estimates) for Latent Parental Support Factors for Each Intersectional Profile

|  | **Intersectional profile** | | | | | | | |
| --- | --- | --- | --- | --- | --- | --- | --- | --- |
| *n*  No. parameters  *df*  Model test statistic(*p*)  RMSEA [90% CI]  CFI  TLI  SRMR  ------------  Omega [95% CI]  Parental nurturing  Parental autonomy-giving | **Male, Higher SES, White British** | **Male, Higher SES, Black** | **Male, Higher SES, South Asian** | **Male, Higher SES, Other** | **Female, Higher SES, White British** | **Female, Higher SES, Black** | **Female, Higher SES, South Asian** | **Female, Higher SES, Other** |
| 367  22  8  2.236 (.007)  0.066 [0.033, 0.101]  0.984  0.970  0.040  0.866 [0.811, 0.901]  0.541 [0.397, 0.658] | 410  22  8  8.173 (.417)  0.007 [0.000, 0.059]  1.000  1.000  0.020  0.882 [0.842, 0.910]  0.678 [0.575, 0.750] | 338  22  8  5.153 (.741)  0.000 [0.000, 0.046]  1.000  1.000  0.016  0.844 [0.769, 0.914]  0.697 [0.688, 0.829] | 512  22  8  8.792 (.360)  0.014 [0.000, 0.055]  0.999  0.999  0.019  0.866 [0.826, 0.897]  0.673 [0.577, 0.743] | 322  22  8  6.272 (.617)  0.000 [0.000, 0.055]  1.000  1.000  0.015  0.931 [0.898, 0.950]  0.681 [0.533, 0.761] | 396  22  8  22.455 (.004)  0.068 [0.035, 0.101]  0.993  0.987  0.027  0.920 [0.892, 0.940]  0.768 [0.694, 0.819] | 205  22  8  15.385 (.052)  0.067 [0.000, 0.117]  0.992  0.985  0.041  0.926 [0.867, 0.957]  0.781 [0.675, 0.845] | 425  22  8  17.165 (.284)  0.052 [0.016, 0.086]  0.994  0.989  0.028  0.901 [0.866, 0.925]  0.758 [0.674, 0.816] |
| *n*  No. parameters  *df*  Model test statistic(*p*)  RMSEA [90% CI]  CFI  TLI  SRMR  ------------  Omega [95% CI]  Parental nurturing  Parental autonomy-giving | **Male, Lower SES, White British** | **Male, Lower SES,**  **Black** | **Male, Lower SES, South Asian** | **Male, Lower SES, Other** | **Female, Lower SES, White British** | **Female, Lower SES, Black** | **Female, Lower SES, South Asian** | **Female, Lower SES, Other** |
| 218  22  8  12.944 (.114)  0.053 [0.000, 0.104]  0.985  0.972  0.042  0.805 [0.719, 0.862]  0.614 [0.410, 0.734] | 385  22  8  14.192 (.077)  0.045 [0.000, 0.082]  0.995  0.991  0.027  0.877 [0.840, 0.903]  0.711 [0.589, 0.772] | 238  22  8  12.904 (.115)  0.051 [0.000, 0.100]  0.989  0.979  0.036  0.838 [0.755, 0.892]  0.732 [0.581, 0.812] | 466  22  8  15.951 (.043)  0.046 [0.008, 0.079]  0.995  0.990  0.023  0.875 [0.839, 0.904]  0.732 [0.653, 0.794] | 220  22  8  19.470 (.0123)  0.081 [0.035, 0.127]  0.981  0.964  0.043  0.875 [0.800, 0.916]  0.818 [0.729, 0.885] | 505  22  8  28.673 (<.001)  0.072 [0.044, 0.101]  0.991  0.982  0.031  0.903 [0.870, 0.927]  0.698 [0.604, 0.758] | 182  22  8  12.970 (.113)  0.058 [0.000, 0.114]  0.994  0.989  0.036  0.903 [0.852, 0.934]  0.723 [0.585, 0.798] | 462  22  8  2.972 (.936)  0.000 [0.000, 0.014]  1.000  1.000  0.008  0.901 [0.865, 0.922]  0.676 [0.577, 0.744] |

*Note.* SES: socio-economic status.Model test statistic: chi-square test of the difference between the saturated and test model. RMSEA: root mean square error of estimation. CFI: comparative fit index. TLI: Tucker Lewis index. SRMR: standardised root mean square residual. Bootstrapped confidence intervals from 1,000 draws.

**Supplementary Table 4.** Fit Indices forMeasurement Invariance Analysis Models (across Intersectionality Profile Groups) and Final Multiple-Group Model

|  | **Measurement invariance** | | | | | | **Final multiple-group model** |
| --- | --- | --- | --- | --- | --- | --- | --- |
| **Common factor depression/anxiety** | | | **Two-factor parental support**  **(parental support, parental autonomy-giving)** | | |
| ***n***  No. parameters  *df*  Model test statistic (*p*)  RMSEA [90% CI]  CFI  TLI  SRMR | **Configural** | **Metric** | **Scalar** | **Configural** | **Metric** | **Scalar** | 5,662  675  1,453  2,030.485 (<.001)  0.034 [0.030, 0.037]  0.976  0.972  0.058 |
| 5,669  240  80  152.002 (<.001)  0.050 [0.038, 0.063]  0.982  0.965  0.034 | 5,669  240  80  152.036 (<.001)  0.050 [0.038, 0.063]  0.982  0.965  0.034 | 5,699  180  140  225.167 (<.001)  0.041 [0.031, 0.051]  0.979  0.976  0.041 | 5,660  352  128  224.304 (<.001)  0.046 [0.036, 0.056]  0.995  0.991  0.028 | 5,660  307  173  286.263 (<.001)  0.043 [0.034, 0.052]  0.994  0.992  0.029 | 5,660  247  233  359.203 (<.001)  0.039 [0.031, 0.047]  0.994  0.993  0.032 |

*Note.* Configural model (no constraints); metric model (constrained thresholds); scalar model (constrained thresholds and loadings). Model test statistic: chi-square test of the difference between the saturated and test model. RMSEA: root mean square error of estimation. CFI: comparative fit index. TLI: Tucker Lewis index. SRMR: standardised root mean square residual. Bootstrapped confidence intervals from 1,000 draws. For the depression/anxiety model, the configural model and the metric mode are equivalent in terms of scaling, number of parameters, and equality constraints. Fit indices were substantively unchanged with multiple imputation using 10 datasets.

**Supplementary Table 5.** Constrained Loading and Threshold Estimates from Final Multiple-Group Model

|  | **Factor loading [95% CI]** | **Threshold 1 [95% CI]** | **Threshold 2 [95% CI]** | **Threshold 3 [95% CI]** |
| --- | --- | --- | --- | --- |
| **Depression/anxiety**  Headaches  Worry  Unhappy  Nervous  Fears  **Parental support**  Understands  Helps  Loving  Better  **Parental autonomy-giving**  Lets  Decisions | *  1.710 [1.299, 2.055]  1.800 [1.484, 2.096]  1.242 [1.067, 1.429]  1.623 [1.304, 2.010]  *  0.987 [0.865, 1.024]  0.982 [0.841, 1.091]  0.986 [0.917, 1.058]  *  0.938 [0.824, 1.163] | 0.490 [0.408, 0.612]  0.133 [-0.023, 0.259]  -0.104 [-0.173, -0.005]  0.651 [0.557, 0.772]  0.998 [0.896, 1.144]  -1.026 [-1.206, -0.910]  -2.634 [-2.940, -2.290]  -1.936 [-2.175, -1.719]  -1.986 [-2.298, -1.848]  -0.830 [-0.962, -0.694]  -1.942 [-2.151, -1.684] | 1.420 [1.260, 1.691]  1.398 [1.097, 1.607]  1.045 [0.946, 1.137]  1.839 [1.652, 2.026]  2.084 [1.867, 2.441]  -0.276 [-0.428, -0.186]  -1.451 [-1.608, -1.245]  -1.373 [-1.528, -1.241]  -1.023 [-1.165, -0.889]  0.287 [0.182, 0.389]  -0.661 [-0.771, -0.543] | NA  NA NA NA NA  a  -0.634 [-0.790, -0.504]  a  -0.349 [-0.482, -0.240]  a  0.252 [0.145, 0.338] |

*Note.* NA: depression/anxiety items are rated on a 3-point scale, so only have 2 estimated thresholds. a: Response categories corresponding to “Never” and “Sometimes” for these items were collapsed owing to missing cell values in some groups (detailed in Supplementary Materials 2). Factor loadings and thresholds constrained across intersectionality profile groups. Each factor is scaled by the loading of its first indicator (item), denoted *. Factor intercepts fixed to 0 and item scales fixed to 1 in the first/reference group (Male, Higher SES, White) for scaling); these parameters are freely estimated in all other groups, scaled in comparison to the reference group. All residual variances/covariances freely estimated in each group (estimates not shown but can be obtained from the corresponding author).

**Supplementary Table 6.** Clustering Indices for Latent Variables

| **Intersectional profile** | **Depression/anxiety** | | | **Parental nurturing** | | | **Parental autonomy-giving** | | |
| --- | --- | --- | --- | --- | --- | --- | --- | --- | --- |
| **Intraclass correlation coefficient** | **Average cluster size** | **Design effect** | **Intraclass correlation coefficient** | **Average cluster size** | **Design effect** | **Intraclass correlation coefficient** | **Average cluster size** | **Design effect** |
| Males, Higher SES, White British  Males, Higher SES, Black  Males, Higher SES, South Asian  Males, Higher SES, Other  Females, Higher SES, White British  Females, Higher SES, Black  Females, Higher SES, South Asian  Females, Higher SES, Other  Males, Lower SES, White British  Males, Lower SES, Black  Males, Lower SES, South Asian  Males, Lower SES, Other  Females, Lower SES, White British  Females, Lower SES, Black  Females, Lower SES, South Asian  Females, Lower SES, Other | 0.095  0.041  0.011  0.001  *No between*  0.020  0.002  *No between*  *No between*  0.007  *No between*  0.026  0.049  0.039  0.041  0.021 | 10.472  10.538  10.871  13.256  -  9.610  6.181  -  -  10.514  -  11.923  5.500  12.700  6.344  11.220 | 1.90  1.39  1.11  1.02  -  1.17  1.01  -  -  1.06  -  1.28  1.22  1.45  1.22  1.21 | 0.009  0.003  0.098  0.056  0.001  0.076  0.001  0.003  *No between*  0.004  0.076  0.016  *No between*  0.038  0.074  0.032 | 10.444  10.512  10.903  13.128  9.200  9.659  6.212  10.119  -  10.405  6.611  11.949  -  12.625  6.276  11.268 | 1.09  1.03  1.96  1.70  1.00  1.66  1.00  1.03  -  1.04  1.43  1.17  -  1.45  1.39  1.33 | 0.092  0.013  0.003  0.070  *No between*  0.044  0.001  0.016  *No between*  *No between*  0.003  0.001  0.030  0.026  0.045  0.025 | 10.444  10.512  10.903  13.128  -  9.659  6.212  10.119  -  -  6.611  11.949  5.500  12.625  6.276  11.268 | 1.86  1.12  1.03  1.85  -  1.38  1.01  1.15  -  -  1.01  1.01  1.14  1.31  1.24  1.16 |

*Note.* Intraclass correlation coefficient as the ratio of the between-cluster (school) variance to the total variance, for each intersectional profile. Design effect calculated as [1 + (average cluster size - 1) * intraclass correlation coefficient]. *No between* indicates a zero estimate of between-cluster variance. Bold typeset indicates potentially non-ignorable clustering (owing to intraclass correlation coefficient > 0.100 and average cluster size < 10).

**Supplementary Table 7.** Clustering Indices for Measured Variables

| **Intersectional profile** | **Youth adversity** | | | **Positive relationship with parental figure** | | | **Friends to confide in** | | | **Friendship integration** | | |
| --- | --- | --- | --- | --- | --- | --- | --- | --- | --- | --- | --- | --- |
| **Intraclass correlation coefficient** | **Average cluster size** | **Design effect** | **Intraclass correlation coefficient** | **Average cluster size** | **Design effect** | **Intraclass correlation coefficient** | **Average cluster size** | **Design effect** | **Intraclass correlation coefficient** | **Average cluster size** | **Design effect** |
| Males, Higher SES, White British  Males, Higher SES, Black  Males, Higher SES, South Asian  Males, Higher SES, Other  Females, Higher SES, White British  Females, Higher SES, Black  Females, Higher SES, South Asian  Females, Higher SES, Other  Males, Lower SES, White British  Males, Lower SES, Black  Males, Lower SES, South Asian  Males, Lower SES, Other  Females, Lower SES, White British  Females, Lower SES, Black  Females, Lower SES, South Asian  Females, Lower SES, Other | 0.049  0.002  0.002  < 0.001  0.011  0.003  0.029  0.032  0.010  0.005  0.023  0.028  0.001  0.030  0.025  0.005 | 10.417  10.513  10.839  13.231  9.200  10.486  6.583  10.119  5.737  10.486  6.583  11.949  5.525  12.725  6.310  11.416 | 1.46  1.02  1.02  1.00  1.09  1.03  1.15  1.29  1.05  1.05  1.13  1.31  1.00  1.35  1.13  1.05 | 0.005  0.001  *No between*  0.047  0.001  0.023  0.015  0.007  0.023  0.002  *No between*  0.002  0.002  0.025  0.008  0.002 | 10.472  10.487  -  13.154  9.086  9.561  6.091  10.190  5.711  10.541  -  11.949  5.475  12.525  6.172  11.146 | 1.05  1.00  -  1.57  1.01  1.20  1.08  1.06  1.11  1.02  -  1.02  1.01  1.29  1.04  1.02 | 0.098  0.030  0.001  0.001  **0.115**  0.001  **0.134**  0.019  0.073  0.053  0.002  0.001  0.058  0.031  **0.113**  0.001 | 10.250  9.795  10.355  12.538  9.029  8.951  6.188  9.902  5.447  9.838  6.250  11.205  5.525  12.100  6.138  10.293 | 1.91  1.26  1.01  1.01  1.92  1.01  1.70  1.17  1.32  1.47  1.01  1.01  1.25  1.34  1.58  1.01 | *No between*  *No between*  *No between*  0.012  *No between*  *No between*  0.003  *No between*  0.006  0.001  0.004  0.005  0.051  0.005  **0.126**  0.034 | -  -  -  10.410  -  -  5.545  -  4.892  7.972  5.417  9.077  4.974  10.615  5.241  8.780 | -  -  -  1.11  -  -  1.01  -  1.02  1.01  1.02  1.04  1.20  1.05  1.53  1.26 |

*Note.* Intraclass correlation coefficient as the ratio of the between-cluster (school) variance to the total variance, for each intersectional profile. Design effect calculated as [1 + (average cluster size - 1) * intraclass correlation coefficient]. *No between* indicates a zero estimate of between-cluster variance. Bold typeset indicates potentially non-ignorable clustering (owing to intraclass correlation coefficient > 0.100 and average cluster size < 10). Potentially non-ignorable clustering was indicated in 4 out of 112 cases (i.e., 7 variables, by 16 groups). Independence of observations was assumed for the main analyses (Lai & Kwok, 2015).

*Lai, M. H. C., & Kwok, O. (2015). Examining the Rule of Thumb of Not Using Multilevel Modeling: The “Design Effect Smaller Than Two” Rule. The Journal of Experimental Education, 83(3), 423–438*

**Supplementary Table 8.** Standardised Effect Estimates of Each Variable on Latent Depression/Anxiety

| **Intersectionality profile** | **Regression estimates**  ***B*z [95% CI]** | | | | | |
| --- | --- | --- | --- | --- | --- | --- |
| **Youth adversity 1, z** | **Parental support variables** | | | **Peer support variables** | |
| **Positive relationship with parental figure 2, y** | **Parental nurturing 3** | **Parental autonomy-giving 4** | **Friends to confide in 5, x** | **Friendship integration 6, w** |
| Males, Higher SES, White British a | **0.274** (0.080), *p* = .001 | -0.104 (0.149), *p* = .485 | 0.203 (0.231), *p* = .381 | -0.359 (0.254), *p* = .158 | 0.017 (0.166), *p* = .918 | -0.065 (0.090), *p* = .468 |
| Males, Higher SES, Black b | **0.253** (0.067), *p* < .001 | -0.126 (0.162), *p* = .434 | 0.005 (0.289), *p* = .987 | 0.018 (0.200) *p* = .927 | -0.205 (0.187), *p* = .273 | -0.165 (0.104), *p* = .113 |
| Males, Higher SES, South Asian c | **0.351** (0.069), *p* < .001 | -0.365 (0.203), *p* = .072 | 0.361 (0.239), *p* = .132 | -0.218 (0.171), *p* = .203 | -0.033 (0.116), *p* = .772 | -0.050 (0.107), *p* = .642 |
| Males, Higher SES, Other d | **0.352** (0.064), *p* < .001 | -0.036 (0.144), *p* = .804 | -0.099 (0.056), *p* = .575 | -0.168 (0.136), *p* = .219 | -0.066 (0.156), *p* = .670 | -0.033 (0.096), *p* = .734 |
| Females, Higher SES, White British e | **0.271** (0.088), *p* = .002 | -0.0411 (0.347), *p* = .236 | 0.030 (0.333), *p* = .929 | 0.108 (0.241), *p* = .655 | -0.439 (0.200), *p* = .028 | -0.132 (0.132), *p* = .316 |
| Females, Higher SES, Black f | **0.229** (0.070), *p* = .001 | -0.150 (0.188), *p* = .426 | -0.132 (0.327), *p* = .688 | 0.058 (0.293), *p* = .844 | -0.261 (0.186), *p* = .161 | -0.062 (0.096), *p* = .517 |
| Females, Higher SES, South Asian g | **0.489** (0.130), *p* < .001 | -0.244 (0.318), *p* = .442 | 0.016 (0.278), *p* = .954 | 0.072 (0.182), *p* = .693 | 0.129 (0.205), *p* = .531 | 0.029 (0.115), *p* = .800 |
| Females, Higher SES, Other h | **0.202** (0.063), *p* = .001 | -0.009 (0.144), *p* = .949 | -0.375 (0.216), *p* = .082 | -0.044 (0.157), *p* = .781 | 0.161 (0.168), *p* = .339 | 0.036 (0.084), *p* = .672 |
| Males, Lower SES, White British i | **0.293** (0.085), *p* = .001 | -0.172 (0.176), *p* = .328 | 0.294 (0.252), *p* = .245 | -0.262 (0.231), *p* = .256 | -0.061 (0.146), *p* = .678 | **-0.441** (0.091,) *p* = .001 |
| Males, Lower SES, Black j | **0.180** (0.066), *p* = .006 | 0.162 (0.138), *p* = .241 | -0.263 (0.171), *p* = .124 | -0.129 (0.158), *p* = .414 | -0.132 (0.144), *p* = .359 | 0.187 (0.084), *p* = .026 |
| Males, Lower SES, South Asian k | **0.204** (0.089), *p =* .023 | -0.046 (0.331), *p =* .890 | -0.268 (0.291), *p =* .357 | 0.178 (0.151), *p =* .240 | -0.111 (0.215), *p =* .606 | -0.082 (0.115), *p =* .477 |
| Males, Lower SES, Other l | **0.322** (0.058), *p <* .001 | 0.035 (0.203), *p =* .863 | -0.249 (0.288), *p =* .387 | -0.036 (0.174), *p =* .836 | -0.031 (0.106), *p =* .772 | -0.126 (0.075), *p =* .090 |
| Females, Lower SES, White British m | **0.240** (0.081), *p =* .003 | -0.233 (0.185), *p =* .208 | 0.191 (0.210), *p =* .363 | -0.133 (0.127), *p =* .294 | -0.089 (0.186), *p =* .631 | -0.131 (0.115), *p =* .253 |
| Females, Lower SES, Black n | **0.238** (0.060), *p <* .001 | -0.017 (0.140), *p =* .901 | 0.226 (0.335), *p =* .499 | -0.439 (0.289), *p =* .129 | -0.246 (0.125), *p =* .048 | 0.064 (0.077), *p =* .408 |
| Females, Lower SES, South Asian o | 0.154 (0.224), *p =* .490 | 0.231 (0.352), *p =* .511 | -1.012 (0.597), *p =* .090 | 0.599 (0.555), *p =* .281 | -0.394 (0.457), *p =* .389 | -0.150 (0.247), *p =* .543 |
| Females, Lower SES, Other p | **0.148** (0.059), *p =* .013 | **-0.434** (0.121), *p <* .001 | 0.030 (0.157), *p =* .847 | -0.068 (0.137), *p =* .621 | -0.010 (0.108), *p =* .929 | -0.009 (0.077), *p =* .909 |

*Note.* Total number of individuals with intersectionality profile data and youth adversity data *N* *=* 5,662. SES: socio-economic status. z standardised indirect effect estimates. The parameter estimates represent the average standard deviation change in latent depression/anxiety for every standard deviation increase in the specified variable. Standardised on latent and measured variable variances. Results were substantively unchanged where missing item-level data and youth adversity data was imputed (10 datasets, *N* *=* 5,700). Bold typeset reflects parameter estimates with the following corresponding *p* values: z *p* <= .047; y *p* <= .003; x, w *p* <= .006 (reflecting false discovery rate adjustment at alpha .05).

a *n* = 375; b *n* = 410; c *n* = 336; d *n* = 516; e *n* = 322; f *n* = 395; g *n* = 204; h *n* = 425; i *n* = 218; j *n* = 388; k *n* = 237; l *n* = 466; m *n* = 221; n *n* = 509; o *n* = 183; p *n* = 457.

1 Sum of youth adversity experiences(measured variable). The parameter estimate for youth adversity is the direct effect estimate of youth adversity on latent depression/anxiety; 2 Binary measure of having a positive relationship with a parental figure(measured variable); 3 Parental nurturing indicated by four items of parenting (latent variable); 4 Parental autonomy-giving indicated by two items of autonomy (latent variable); 5 Binary measure of having friends to confide in(measured variable); 6 Binary measure of friendship integration (measured variable).

**Supplementary Table 9.** Standardised Indirect Effects of Youth Adversity on Latent Depression/Anxiety

| **Intersectionality profile** | ***n*** | **Specific indirect effect estimates 1**  **θa [95% CI]** | | | | |
| --- | --- | --- | --- | --- | --- | --- |
| **Parental support variables** | | | **Peer support variables** | |
| **Positive relationship with parental figure 2** | **Parental nurturing 3** | **Parental autonomy-giving 4** | **Friends to confide in 5** | **Friendship integration 6** |
| Males, Higher SES, White British a | 375 | -0.010 [-0.093, 0.006] | -0.011 [-0.070, 0.022] | **0.055** [0.003, 0.163] | 0.000 [-0.028, 0.236] | -0.003 [-0.037, 0.004] |
| Males, Higher SES, Black b | 410 | -0.007 [-0.095, 0.013] | -0.001 [-0.215, 0.078] | -0.002 [-0.052, 0.043] | 0.025 [-0.048, 0.093] | 0.008 [-0.002, 0.039] |
| Males, Higher SES, South Asian c | 336 | 0.038 [-0.047, 0.128] | -0.047 [-0.224, 0.008] | 0.032 [-0.047, 0.132] | 0.002 [-0.002, 0.026] | -0.003 [-0.032, 0.021] |
| Males, Higher SES, Other d | 516 | 0.000 [-0.028, 0.030] | 0.010 [-0.046, 0.068] | 0.001 [-0.039, 0.031] | 0.016 [-0.068, 0.099] | 0.001 [-0.002, 0.012] |
| Females, Higher SES, White British e | 322 | 0.034 [-0.047, 0.114] | -0.007 [-0.139, 0.174] | -0.019 [-0.139, 0.033] | 0.102 [-0.069, 0.173] | -0.014 [-0.118, 0.003] |
| Females, Higher SES, Black f | 395 | 0.003 [-0.062, 0.036] | 0.010 [-0.052, 0.090] | -0.003 [-0.188, 0.043] | -0.006 [-0.086, 0.091] | 0.006 [-0.016, 0.086] |
| Females, Higher SES, South Asian g | 204 | -0.050 [-0.519, 0.034] | -0.001 [-0.104, 0.526] | 0.017 [-0.224, 0.264] | -0.032 [-0.579, 0.160] | -0.003 [-0.082, 0.073] |
| Females, Higher SES, Other h | 425 | -0.001 [-0.034, 0.047] | 0.025 [-0.012, 0.086] | 0.001 [-0.040, 0.022] | -0.016 [-0.181, 0.041] | -0.002 [-0.023, 0.010] |
| Males, Lower SES, White British i | 218 | 0.016 [-0.023, 0.074] | -0.022 [-0.133, 0.006] | 0.053 [-0.008, 0.189] | 0.021 [-0.051, 0.115] | 0.037 [-0.025, 0.136] |
| Males, Lower SES, Black j | 388 | -0.004 [-0.044, 0.014] | 0.032 [-0.032, 0.104] | 0.020 [-0.062, 0.063] | -0.003 [-0.123, 0.026] | -0.017 [-0.057, 0.005] |
| Males, Lower SES, South Asian k | 237 | 0.007 [-0.066, 0.147] | 0.038 [-0.183, 0.208] | -0.002 [-0.011, 0.031] | -0.011 [-0.163, 0.031] | -0.005 [-0.040, 0.009] |
| Males, Lower SES, Other l | 466 | -0.003 [-0.036, 0.034] | 0.028 [-0.048, 0.093] | 0.000 [-0.050, 0.027] | 0.002 [-0.013, 0.033] | 0.009 [-0.012, 0.028] |
| Females, Lower SES, White British m | 221 | 0.017 [-0.026, 0.118] | -0.041 [-0.131, 0.045] | 0.003 [-0.012, 0.044] | 0.013 [-0.040, 0.096] | -0.001 [-0.032, 0.032] |
| Females, Lower SES, Black n | 509 | 0.001 [-0.027, 0.037] | -0.025 [-0.222, 0.031] | 0.038 [-0.021, 0.120] | -0.003 [-0.027, 0.053] | -0.004 [-0.038, 0.007] |
| Females, Lower SES, South Asian o | 183 | -0.058 [-0.276, 0.169] | **0.231** [0.004, 0.482] | 0.014 [-0.060, 0.258] | 0.079 [-0.072, 0.366] | -0.006 [-0.079, 0.006] |
| Females, Lower SES, Other p | 457 | 0.063 [-0.011, 0.146] | -0.004 -0.053, 0.058] | 0.003 [-0.040, 0.029] | 0.000 [-0.020, 0.032] | 0.001 [-0.010, 0.021] |

*Note.* Total number of individuals with intersectionality profile data and youth adversity data *N* *=* 5,662. SES: socio-economic status. a standardised indirect effect estimates. Bias-corrected bootstrapped CI from 1,000 draws in square brackets. Standardised on latent and measured variable variances. Results were substantively unchanged where missing item-level data was imputed (10 datasets, *N* *=* 5,700). Effect estimates with non-zero overlapping CI shown in bold typeset.

1 The specific indirect effect estimates represent the average standard deviation change in latent depression/anxiety for every standard deviation increase in youth adversity via each of the variables, separately; 2 Sum of youth adversity experiences(measured variable); 3 Binary measure of having a positive relationship with a parental figure(measured variable); 4 Parental nurturing indicated by four items of parenting (latent variable); 5 Parental autonomy-giving indicated by two items of autonomy (latent variable); 6 Binary measure of having friends to confide in(measured variable); v Binary measure of friendship integration (measured variable).

**Supplementary Table 10.** Moderation Estimates for the Direct Effect of Youth Adversity on Latent Depression/Anxiety

| **Background characteristic** | **Youth adversity**  ***b*a (*SE*) [95% CI]** |
| --- | --- |
| **Weighted averages (*n*)**  Males (2,946)  Females (2,716)  Higher SES (2,983)  Lower SES (2,679)  White British (1,136)  Black (1,702)  South Asian (960)  Other (1,864) | 0.179 (0.028) [0.133, 0.229]  0.142 (0.039) [0.082, 0.200]  0.190 (0.037) [0.148, 0.253]  0.130 (0.023) [0.083, 0.178]  0.159 (0.044) [0.100, 0.247]  0.150 (0.035) [0.100, 0.186]  0.210 (0.083) [0.109, 0.355]  0.148 (0.024) [0.092, 0.182] |
|  | **∆*b*b (*SE*) [95% CI]** |
| **Weighted main effects**  Gender (male – female)  SES (higher – lower)  White British – Black  White British– South Asian  White British– Other  Black – South Asian  Black – Other  South Asian – Other | 0.037 (0.045) [-0.055, 0.098]  **0.060** (0.037) [0.007, 0.125]  0.009 (0.060) [-0.089, 0.139]  -0.051 (0.090) [-0.175, 0.050]  0.011 (0.040) [-0.060, 0.062]  -0.060 (0.082) [-0.368, 0.032]  0.002 (0.045) [-0.076, 0.087]  0.062 (0.080) [-0.040, 0.203] |
| **Weighted interaction effects**  Gender x SES  Gender x White British/Black  Gender x White British/South Asian  Gender x White British/Other  Gender x Black/South Asian  Gender x Black/Other  Gender x South Asian/Other  SES x White British/Black  SES x White British/South Asian  SES x White British/Other  SES x Black/South Asian  SES x Black/Other  SES x South Asian/Other  Gender x SES x White British/Black  Gender x SES x White British/South Asian  Gender x SES x White British/Other  Gender x SES x Black/South Asian  Gender x SES x Black/Other  Gender x SES x South Asian/Other | -0.034 (0.076) [-0.122, 0.125]  -0.008 (0.118) [-0.220, 0.193]  0.021 (0.219) [-0.269, 0.247]  -0.101 (0.089) [-0.320, 0.023]  0.029 (0.212) [-0.281, 0.195]  -0.093 (0.089) [-0.324, 0.097]  -0.122 (0.206) [-1.140, 0.055]  -0.036 (0.080) [-0.149, 0.157]  -0.163 (0.187) [-1.017, 0.059]  -0.027 (0.080) [-0.146, 0.123]  -0.127 (0.185) [-0.951, 0.040]  0.008 (0.079) [-0.168, 0.120]  0.136 (0.177) [-0.56, 0.422]  -0.091 (0.225) [-0.657, 0.278]  0.129 (0.432) [-0.378, 0.541]  0.186 (0.387) [-0.201, 0.535]  0.220 (0.433) [-0.283, 0.732]  0.031 (0.144) [-0.256, 0.316]  -0.190 (0.395) [-2.182, 0.126] |

*Note.* *n* *=* 5,662. SES: socio-economic status. a unstandardised indirect effect estimates. b difference in unstandardised indirect effect estimates. Bias-corrected bootstrapped CI from 1,000 draws in square brackets. Effect estimates with non-zero overlapping CI shown in bold typeset.

**Supplementary Table 11.** Moderation Estimates for the Indirect Effect of Youth Adversity on Latent Depression/Anxiety via the Parental Support Variables

| **Background characteristic** | **Parental support variables**  **θa** **(*SE*) [95% CI]** | | |
| --- | --- | --- | --- |
| **Positive relationship with parental figure 1** | **Parental nurturing 2** | **Parental autonomy-giving 3** |
| **Weighted averages (*n*)**  Males (2,946)  Females (2,716)  Higher SES (2,983)  Lower SES (2,679)  White British (1,136)  Black (1,702)  South Asian (960)  Other (1,864) | 0.002 (0.007) [-0.018, 0.014]  0.004 (0.013) [-0.021, 0.032]  0.002 (0.012) [-0.023, 0.035]  0.005 (0.009) [-0.014, 0.025]  0.008 (0.011) [-0.005, 0.026]  -0.001 (0.007) [-0.016, 0.014]  -0.003 (0.033) [-0.090, 0.052]  0.007 (0.009) [-0.007, 0.230] | 0.003 (0.013) [-0.028, 0.022]  0.006 (0.015) [-0.019, 0.036]  -0.001 (0.014) [-0.034, 0.026]  0.011 (0.017) [-0.022, 0.033]  -0.010 (0.021) [-0.036, 0.035]  0.003 (0.025) [-0.060, 0.034]  0.019 (0.033) [-0.055, 0.053]  0.008 (0.013) [-0.051, 0.021] | 0.010 (0.009) [-0.001, 0.041]  0.004 (0.014) [-0.022, 0.029]  0.006 (0.012) [-0.020, 0.022]  0.009 (0.009) [-0.004, 0.024]  0.013 (0.021) [-0.060, 0.039]  0.008 (0.017) [-0.020, 0.047]  0.012 (0.026) [-0.042, 0.050]  0.001 (0.005) [-0.009, 0.011] |
|  | **∆θb** **(*SE*) [95% CI]** | | |
| **Weighted main effects**  Gender (male – female)  SES (higher – lower)  White British – Black  White British – South Asian  White British – Other  Black – South Asian  Black – Other  South Asian – Other | -0.002 (0.015) [-0.036, 0.024]  -0.003 (0.015) [-0.026, 0.045]  0.009 (0.014) [-0.021, 0.034]  0.011 (0.035) [-0.057, 0.088]  0.001 (0.014) [-0.024, 0.031]  0.002 (0.032) [-0.050, 0.089]  -0.009 (0.012) [-0.027, 0.012]  -0.011 (0.033) [-0.103, 0.050] | -0.003 (0.021) [-0.048, 0.035]  -0.012 (0.024) [-0.060, 0.022]  -0.012 (0.035) [-0.065, 0.103]  -0.029 (0.043) [-0.103, 0.050]  -0.018 (0.028) [-0.055, 0.086]  -0.017 (0.039) [-0.109, 0.037]  -0.005 (0.026) [-0.049, 0.048]  0.011 (0.038) [-0.069, 0.059] | 0.006 (0.016) [-0.019, 0.034]  -0.004 (0.013) [-0.027, 0.023]  0.005 (0.023) [-0.053, 0.040]  0.002 (0.031) [-0.045, 0.059]  0.013 (0.022) [-0.061, 0.042]  -0.003 (0.033) [-0.068, 0.109]  0.008 (0.018) [-0.026, 0.046]  0.011 (0.026) [-0.043, 0.046] |
| **Weighted interaction effects**  Gender x SES  Gender x White British/Black  Gender x White British/South Asian  Gender x White British/Other  Gender x Black/South Asian  Gender x Black/Other  Gender x South Asian/Other  SES x White British/Black  SES x White British/South Asian  SES x White British/Other  SES x Black/South Asian  SES x Black/Other  SES x South Asian/Other  Gender x SES x White British/Black  Gender x SES x White British/South Asian  Gender x SES x White British/Other  Gender x SES x Black/South Asian  Gender x SES x Black/Other  Gender x SES x South Asian/Other | 0.010 (0.034) [-0.048, 0.073]  -0.011 (0.031) [-0.067, 0.039]  -0.069 (0.090) [-0.325, 0.100]  0.001 (0.032) [-0.052, 0.041]  -0.058 (0.090) [-0.232, 0.201]  0.012 (0.021) [-0.038, 0.046]  0.070 (0.093) [-0.203, 0.232]  -0.002 (0.021) [-0.054, 0.033]  -0.016 (0.073) [-0.279, 0.130]  0.013 (0.028) [-0.053, 0.056]  -0.014 (0.073) [-0.292, 0.129]  0.015 (0.019) [-0.032, 0.046]  0.029 (0.072) [-0.126, 0.135]  -0.024 (0.052) [-0.086, 0.068]  -0.053 (0.189) [-0.379, 0.236]  -0.098 (0.138) [-0.446, 0.182]  -0.029 (0.186) [-0.353, 0.323]  -0.038 (0.042) [-0.150, 0.034]  -0.009 (0.200) [-0.343, 0.323] | -0.019 (0.047) [-0.242, 0.044]  -0.013 (0.076) [-0.296, 0.099]  0.069 (0.087) [-0.134, 0.235]  -0.003 (0.055) [-0.124, 0.096]  0.082 (0.097) [-0.060, 0.303]  0.010 (0.058) [-0.091, 0.150]  -0.071 (0.081) [-0.285, 0.034]  0.012 (0.043) [-0.052, 0.076]  0.104 (0.102) [-0.163, 0.361]  0.011 (0.047) [-0.098, 0.086]  0.092 (0.107) [-0.077, 0.235]  -0.001 (0.042) [-0.054, 0.147]  -0.094 (0.098) [-0.321, 0.126]  0.031 (0.108) [-0.111, 0.257]  -0.080 (0.165) [-0.412, 0.192]  -0.002 (0.128) [-0.099, 0.466]  -0.110 (0.156) [-0.392, 0.207]  -0.018 (0.093) [-0.275, 0.075]  0.093 (0.159) [-0.226, 0.388] | 0.013 (0.028) [-0.025, 0.055]  0.042 (0.051) [-0.034, 0.123]  0.036 (0.063) [-0.151, 0.115]  0.038 (0.043) [-0.032, 0.146]  -0.006 (0.071) [-0.235, 0.087]  -0.003 (0.038) [-0.096, 0.074]  0.003 (0.055) [-0.131, 0.104]  0.014 (0.035) [-0.031, 0.064]  -0.022 (0.048) [-0.114, 0.041]  -0.006 (0.031) [-0.063, 0.029]  -0.036 (0.050) [-0.148, 0.035]  -0.019 (0.032) [-0.113, 0.028]  0.017 (0.042) [-0.075, 0.077]  0.005 (0.079) [-0.148, 0.178]  -0.006 (0.131) [-0.288, 0.227]  0.023 (0.106) [-0.266, 0.222]  -0.011 (0.122) [-0.316, 0.171]  0.006 (0.058) [-0.071, 0.077]  0.017 (0.114) [-0.215, 0.206] |

*Note.* *n =* 5,662. SES: socio-economic status. a unstandardised indirect effect estimates. b difference in unstandardised indirect effect estimates. Bias-corrected bootstrapped CI from 1,000 draws in square brackets. Effect estimates with non-zero overlapping CI shown in bold typeset.

1 Binary measure of having a positive relationship with a parental figure(measured variable); 2 Parental nurturing indicated by four items of parenting (latent variable); 3 Parental autonomy-giving indicated by two items of autonomy (latent variable).

**Supplementary Table 12.** Moderation Estimates for the Indirect Effects of Youth Adversity on Latent Depression/Anxiety via the Peer Support Variables

| **Background characteristic** | **Peer support variables**  **θa** **(*SE*) [95% CI]** | |
| --- | --- | --- |
| **Friends to confide in 1** | **Friendship integration 2** |
| **Weighted averages (*n*)**  Males (2,946)  Females (2,716)  Higher SES (2,983)  Lower SES (2,679)  White British (1,136)  Black (1,702)  South Asian (960)  Other (1,864) | 0.005 (0.009) [-0.014, -0.016]  0.007 (0.017) [-0.037, 0.028]  0.008 (0.015) [-0.025, 0.021]  0.004 (0.010) [-0.008, 0.017]  0.022 (0.019) [-0.007, 0.046]  0.002 (0.013) [-0.024, 0.014]  0.002 (0.036) [-0.093, 0.060]  0.001 (0.016) [-0.022, 0.015] | 0.001 (0.003) [-0.006, 0.007]  -0.001 (0.005) [-0.007, 0.009]  0.000 (0.005) [-0.006, 0.019]  0.000 (0.003) [-0.003, 0.005]  0.001 (0.008) [-0.017, 0.019]  -0.001 (0.006) [-0.009, 0.004]  -0.003 (0.007) [-0.025, 0.007]  0.001 (0.002) [-0.002, 0.004] |
|  | **∆θb** **(*SE*) [95% CI]** | |
| **Weighted main effects**  Gender (male – female)  SES (higher – lower)  White British – Black  White British – South Asian  White British– Other  Black – South Asian  Black – Other  South Asian – Other | -0.003 (0.019) [-0.033, 0.050]  0.004 (0.016) [-0.039, 0.020]  0.020 (0.024) [-0.031, 0.055]  0.020 (0.039) [-0.069, 0.074]  0.021 (0.026) [-0.070, 0.048]  0.000 (0.037) [-0.098, 0.058]  0.001 (0.022) [-0.027, 0.059]  0.001 (0.037) [-0.043, 0.066] | 0.002 (0.006) [0-0.011, 0.013]  0.000 (0.005) [-0.007, 0.016]  0.002 (0.008) [-0.021, 0.016]  0.004 (0.010) [-0.024, 0.024]  0.000 (0.008) [-0.016, 0.013]  0.002 (0.009) [-0.024, 0.020]  -0.002 (0.006) [-0.012, 0.005]  -0.004 (0.008) [-0.025, 0.006] |
| **Weighted interaction effects**  Gender x SES  Gender x White British/Black  Gender x White British/South Asian  Gender x White British/Other  Gender x Black/South Asian  Gender x Black/Other  Gender x South Asian/Other  SES x White British/Black  SES x White British/South Asian  SES x White British/Other  SES x Black/South Asian  SES x Black/Other  SES x South Asian/Other  Gender x SES x White British/Black  Gender x SES x White British/South Asian  Gender x SES x White British/Other  Gender x SES x Black/South Asian  Gender x SES x Black/Other  Gender x SES x South Asian/Other | 0.006 (0.039) [-0.151, 0.076]  -0.048 (0.036) [-0.155, 0.005]  -0.026 (0.095) [-0.265, 0.134]  -0.047 (0.042) [-0.126, -0.001]  0.022 (0.085) [-0.219, 0.143]  0.001 (0.036) [-0.053, 0.155]  -0.021 (0.100) [-0.187, 0.210]  0.012 (0.043) [-0.059, 0.098]  0.043 (0.095) [-0.088, 0.196]  0.020 (0.045) [-0.033, 0.086]  0.032 (0.087) [-0.086, 0.152]  0.008 (0.043) [-0.058, 0.129]  -0.024 (0.092) [-0.391, 0.060]  -0.094 (0.095) [-0.281, 0.050]  -0.148 (0.162) [-0.407, 0.120]  -0.103 (0.145) [-0.549, 0.172]  -0.054 (0.153) [-0.337, 0.283]  0.005 (0.069) [-0.096, 0.205]  0.060 (0.143) [-0.359, 0.212] | 0.000 (0.013) [-0.030, 0.019]  0.016 (0.015) [-0.011, 0.059]  0.013 (0.024) [-0.032, 0.053]  0.010 (0.014) [-0.014, 0.027]  -0.003 (0.022) [-0.038, 0.054]  -0.007 (0.010) [-0.037, 0.009]  -0.003 (0.020) [-0.048, 0.024]  -0.028 (0.020) [-0.089, 0.000]  -0.017 (0.021) [-0.063, 0.018]  -0.013 (0.015) [-0.045, 0.021]  0.010 (0.019) [-0.021, 0.044]  0.014 (0.014) [-0.006, 0.060]  0.004 (0.017) [-0.059, 0.027]  -0.026 (0.043) [-0.149, 0.044]  -0.016 (0.058) [-0.147, 0.103]  -0.014 (0.046) [-0.122, 0.071]  0.010 (0.043) [-0.088, 0.097]  0.013 (0.027) [-0.042, 0.058]  0.004 (0.039) [-0.129, 0.046] |

*Note.* *n =* 5,662. SES: socio-economic status. a unstandardised indirect effect estimates. b difference in unstandardised indirect effect estimates. Bias-corrected bootstrapped CI from 1,000 draws in square brackets. Effect estimates with non-zero overlapping CI shown in bold typeset.

1 Binary measure of having friends to confide in(measured variable); 2 Binary measure of friendship integration (measured variable).
